# Supplementary material for: Motion of microswimmers in cylindrical microchannels
Source: Royal Society of Chemistry journal article supplement (doi:10.1039/d3sm01480k), 2024-01-01
Supplement: d3sm01480k1.pdf [file d3sm01480k1.pdf]

## Supplementary Information for

Motion of microswimmers in cylindrical microchannels

Florian A. Overberg, Gerhard Gompper, and Dmitry A.  
Fedosov

Theoretical Physics of Living Matter, Institute of Biological Information  
Processing and Institute for Advanced Simulation, Forschungszentrum  
Jülich, 52425 Jülich, Germany

Email: [f.overberg@fz-juelich.de](mailto:f.overberg@fz-juelich.de), [g.gompper@fz-juelich.de](mailto:g.gompper@fz-juelich.de),  
[d.fedosov@fz-juelich.de](mailto:d.fedosov@fz-juelich.de)

## Supplementary Figures

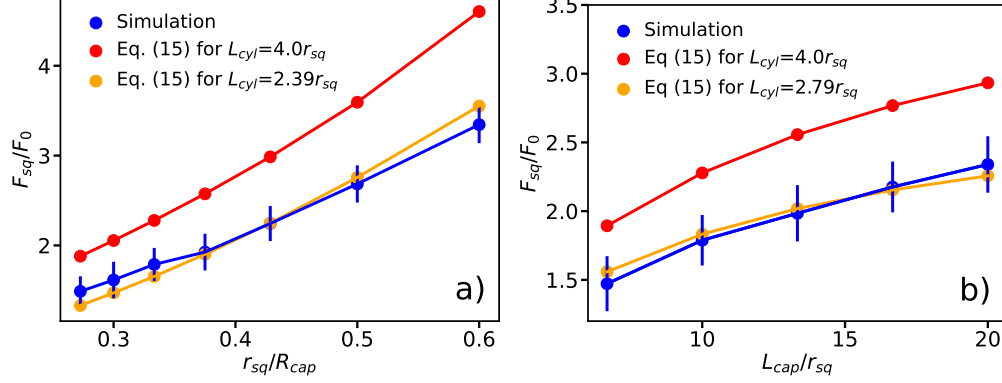

**Figure S1:** Propulsion force  $F_{sq}$  of a spring-fixed neutral spheroidal squirmer with  $b_x = b_y$  and  $b_z = 2b_x$  in an open capillary tube in comparison with the analytical prediction from Eq. (15) for (a) different confinements  $D = r_{sq}/R_{cap}$  with  $L_{cap} = 10r_{sq}$  and (b) various capillary lengths  $L_{cap}$  with  $D = 0.33$ . The red and orange lines show propulsion forces from the analytical solution in Eq. (16) for a cylindrical swimmer with radius  $r_{cyl} = r_{sq}$ , surface velocity  $u_{cyl} = -B_1$  and two different lengths  $L_{cyl}$ . The force is normalized by  $F_0 = 6\pi\eta r_{sq}v_0$  with  $v_0 = 0.83B_1$ , which is the bulk velocity of a spheroidal squirmer with the given eccentricity.
